# Supplementary material for: A New Versatile Platform for Assessment of Improved Cardiac Performance in Human-Engineered Heart Tissues
Source: MDPI journal article supplement (doi:10.3390/jpm12020214), 2022-02-04
Supplement: s1 [file s1]

## Supplementary Materials

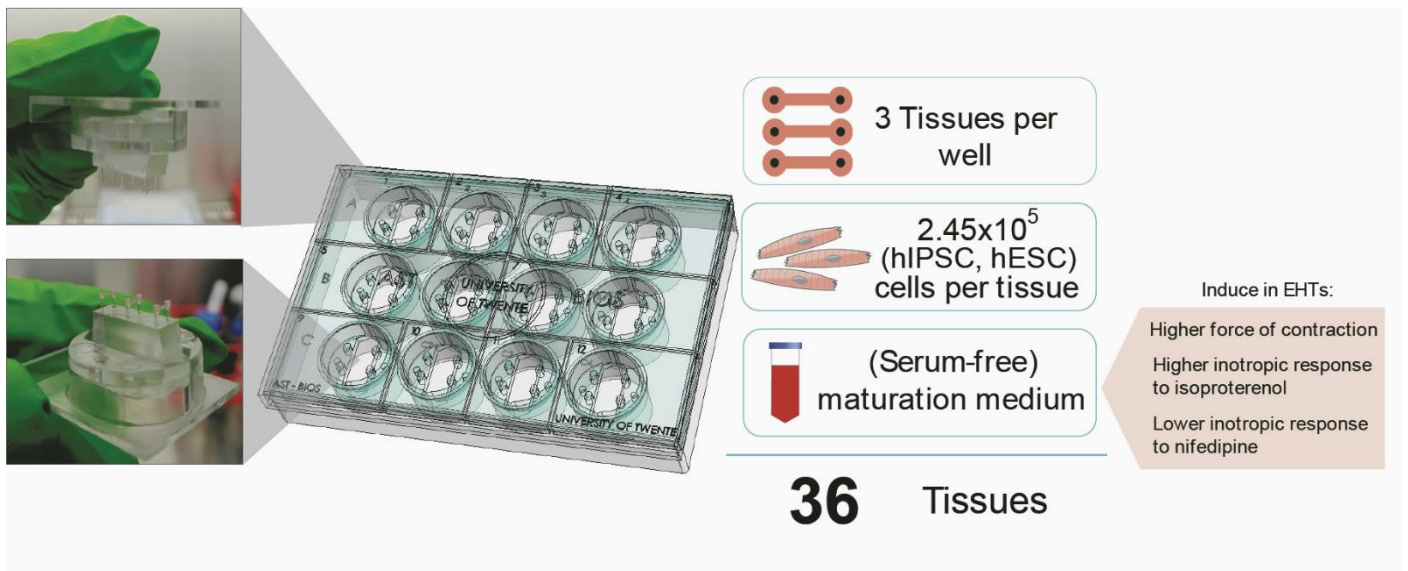

**Figure S1.** Schematic of the main advantages of the versatile platform for assessment of human engineered heart tissues

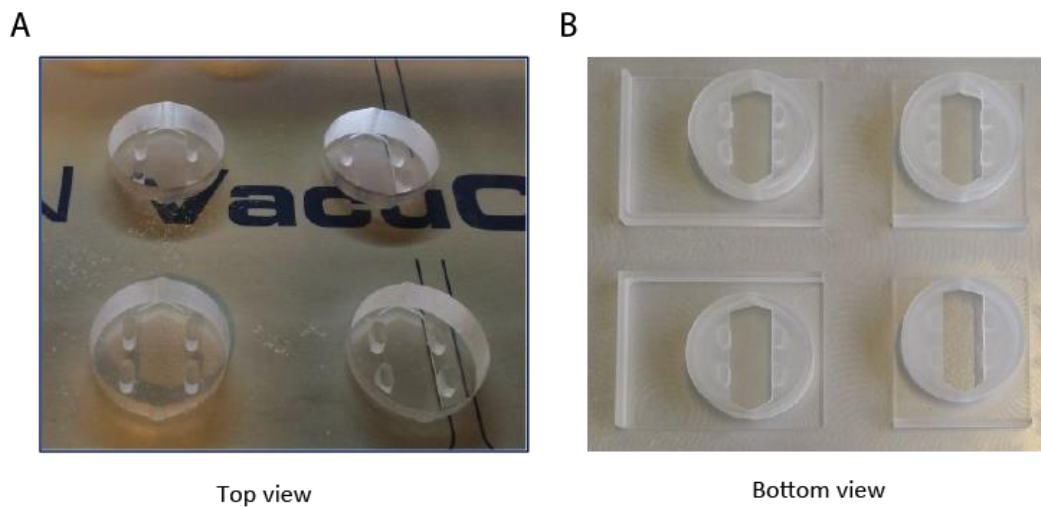

**Figure S2.** Holders fabrication from PMMA by a milling machine. (A) Top part of the set of 4 holders from PMMA (B) Bottom part of the set of 4 holders from PMMA.

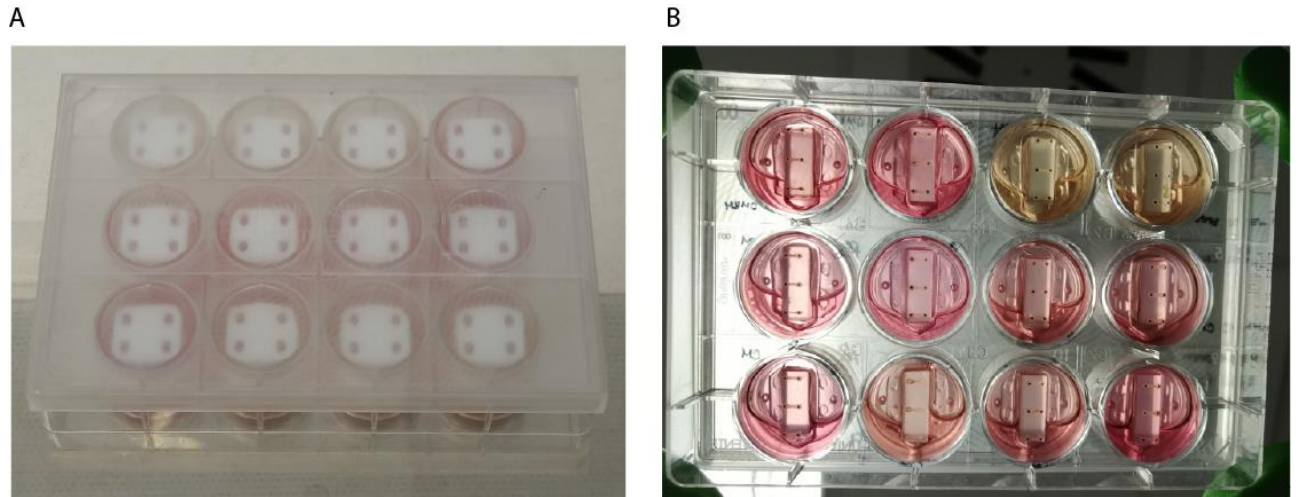

**Figure S3.** Bioengineered platform (A) Top view of the platform with 12 spacers. (B) Bottom view of the platform with 36 EHTs in different media.

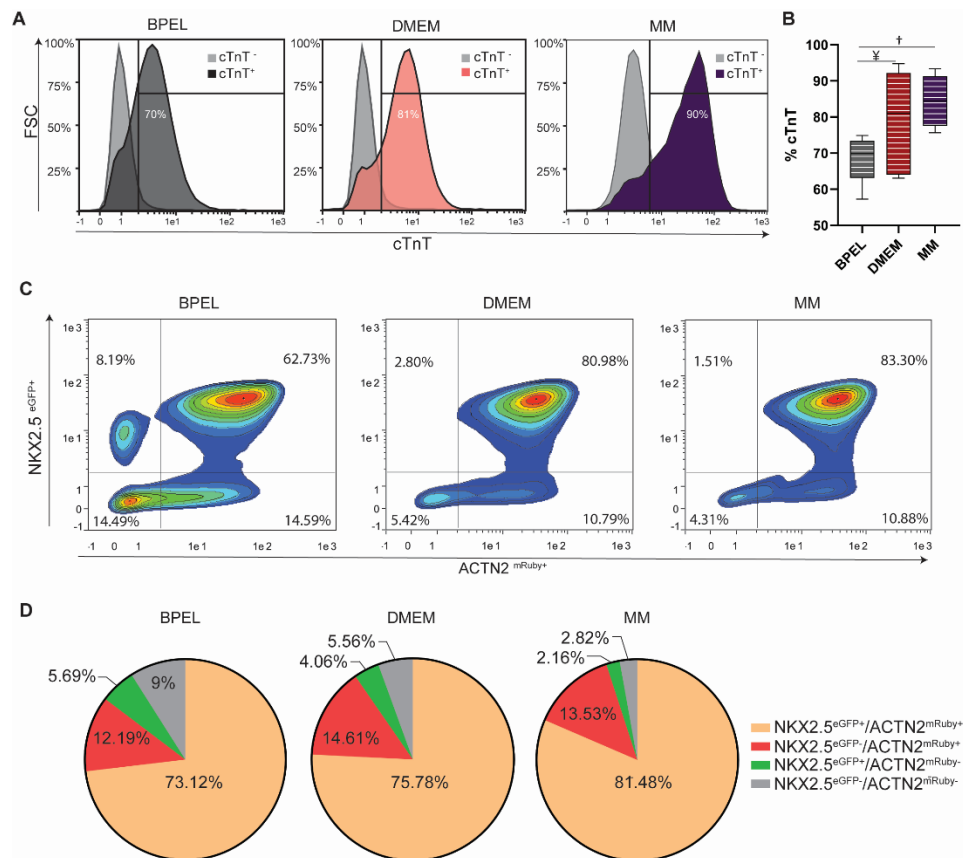

**Figure S4.** Cardiomyocyte differentiation. Flow cytometry (FC) characterization of differentiated CMs at D17 in different media. (A) Representative hiPSC-CM histograms of cardiac troponin T positive cells (cTnT). (B) Average hiPSC-CM differentiation efficiency with cardiac troponin T percentages (% cTnT). Data shown as One-way ANOVA plus Tukey's test. Values expressed as means  $\pm$  SEM.  $\text{\yen} = p < 0.05$ ;  $\text{\textdagger} = p < 0.01$ . (C) Representative hESC-CM density plots of ACTN2-(ACTN2mRuby+) and NKX2.5 (NKX2.5eGFP+) positive cells. (D) Average hESC-cardiomyocyte differentiation efficiency pie charts.

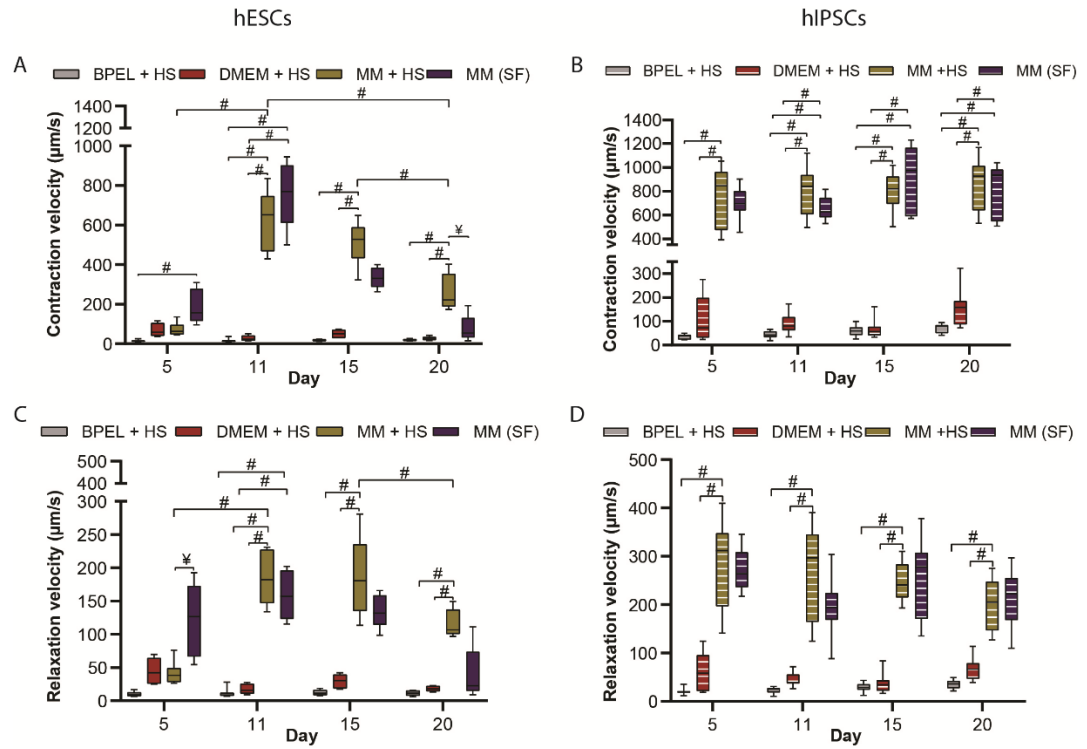

**Figure S5.** Contraction & Relaxation velocity in different media. (A-B) Contraction velocity in hESCs (A) and hiPSCs (B) at day 5, 11, 15 and 20. (C-D) Relaxation velocity in hESCs (C) and hiPSCs (D) at day 5, 11, 15 and 20. Data shown as means, maxima and minima; Two-way ANOVA plus Tukey's test for comparisons among media; † =  $p < 0.01$ ; ‡ =  $p < 0.001$ ; # =  $p < 0.0001$ . HS = Horse serum; SF = serum free.

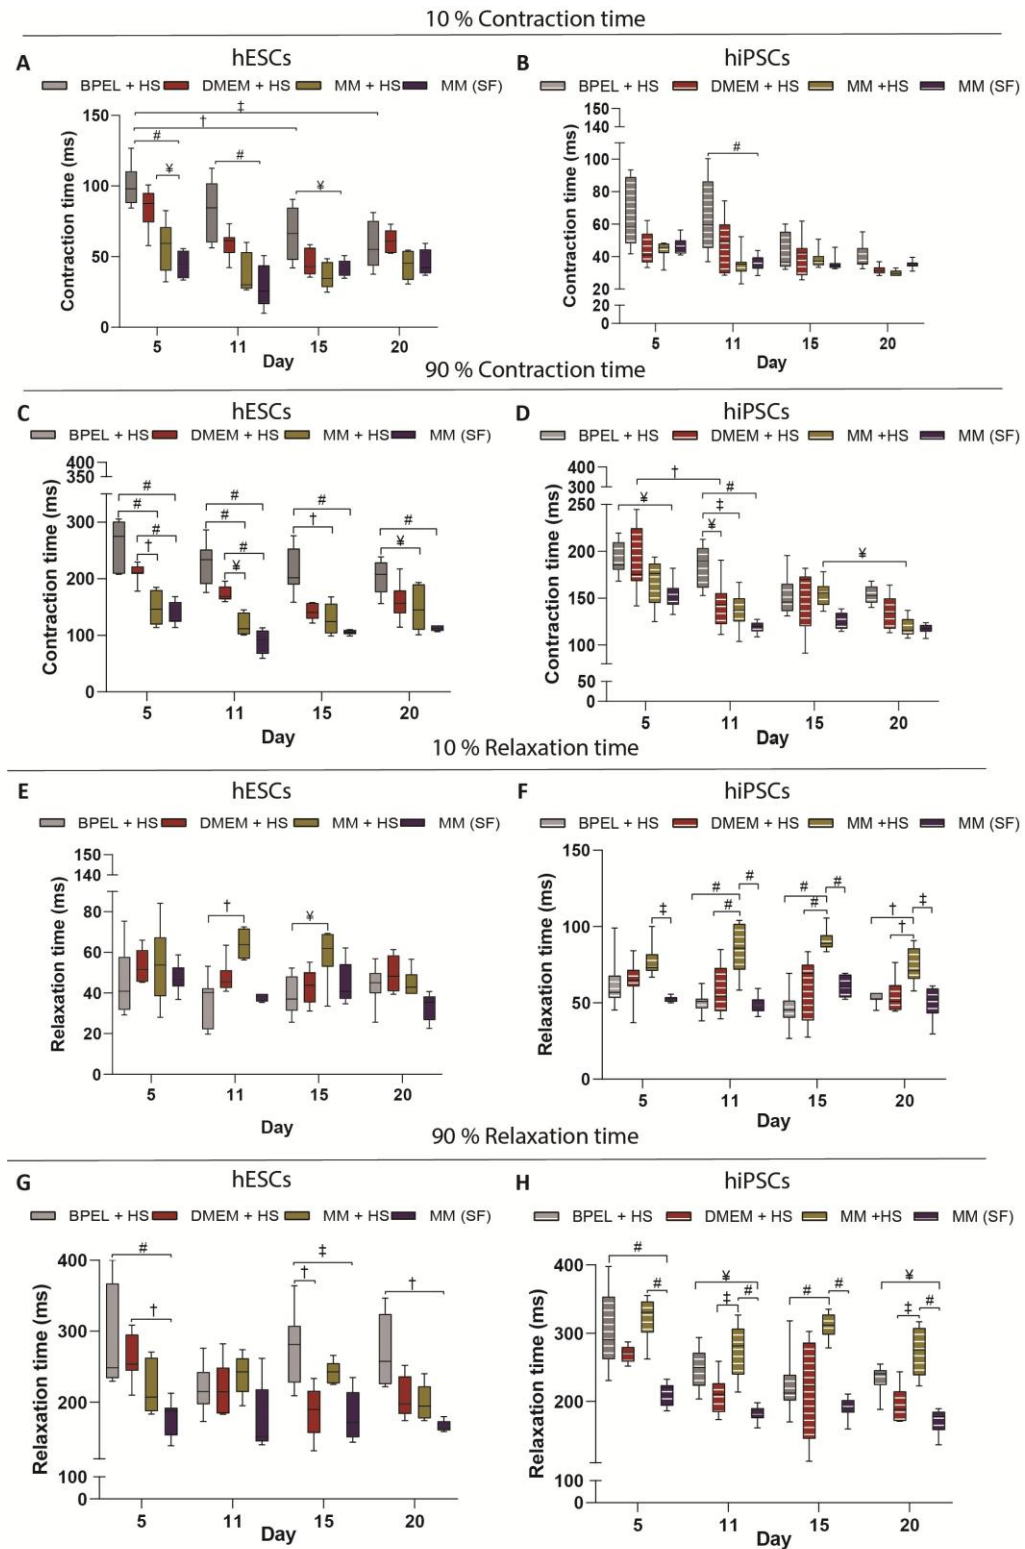

**Figure S6.** Contraction & Relaxation time in different media. (A-B) Time to reach the 10 % of contraction in hESCs (A) and hiPSC (B). (C-D) Time to reach the 90 % of contraction in hESCs (C) and hiPSC (D). (E-F) Time to reach the 10 % of relaxation in hESCs (E) and hiPSC (F) (G-H) Time to reach the 90 % of relaxation in hESCs (G) and hiPSC (H). Data shown as means, maxima and minima; Two-way ANOVA plus Tukey's test; ¥ =  $p < 0.05$ ; † =  $p < 0.01$ ; ‡ =  $p < 0.001$ ; # =  $p < 0.0001$ . HS = Horse serum; SF = serum free.

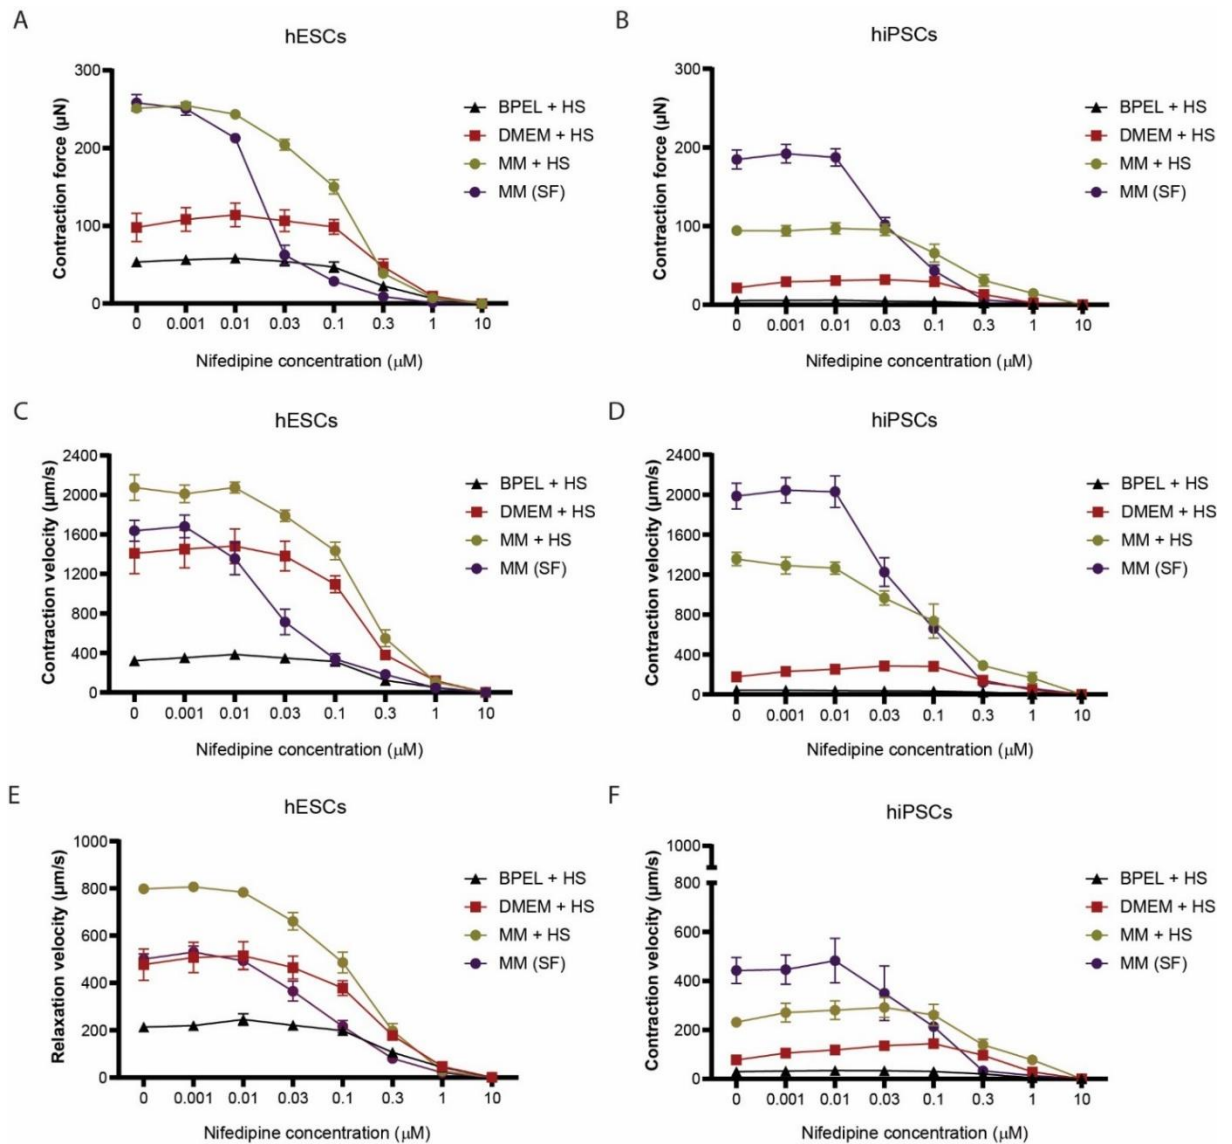

**Figure S7.** Response to negative inotropic agents in hESC- and hiPSC-EHTs. A-B. Contraction force of hESCs (A) and hiPSCs (B) EHTs in different media in response to nifedipine (0-10  $\mu$ M). C-F. Contraction and relaxation velocity in different media in response to nifedipine (0-10  $\mu$ M). C-D. Contraction velocity in hESCs (C) and hiPSCs (D). (E-F) Relaxation velocity in hESCs (E) and hiPSCs (F). A-F. Values are expressed as means  $\pm$  SEM. HS = Horse serum; SF = serum free.



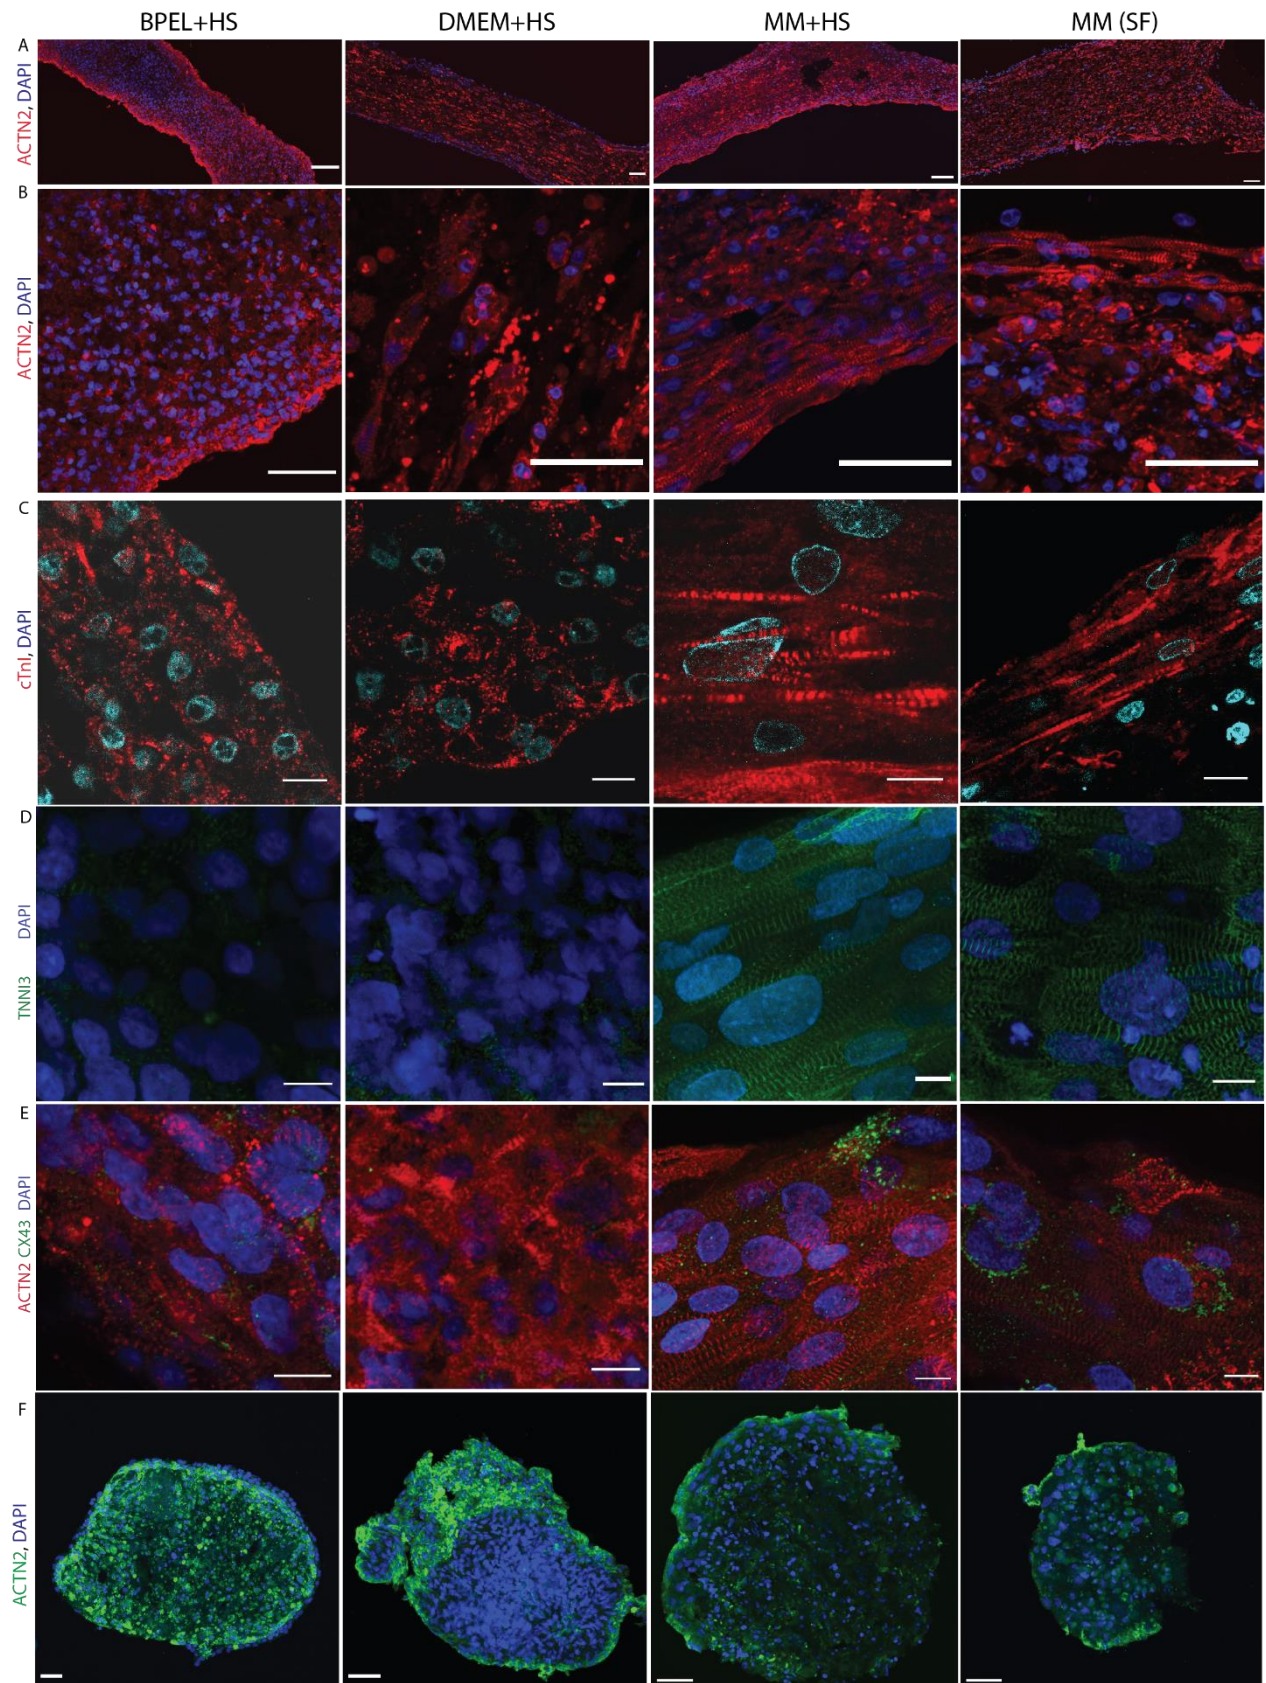

**Figure S8.** Morphological analysis of EHTs. A-B. Representative tissue cryosections immunostained for  $\alpha$ -actinin (ACTN2, red) and DAPI (nuclei, blue). C. Representative paraffin sections of EHTs immunostained for cardiac troponin-I (cTnI, red) counterstained with DAPI (nuclei, blue). D-E. Confocal images of whole mount tissue immunostaining for cardiac troponin I (TNNT3, green)(D) or  $\alpha$ -actinin (ACTN2, red) and Connexin 43 (CX43, green)(E), counterstained with DAPI (nuclei, blue). F. Representative transversal cryosections immunostained for  $\alpha$ -actinin (ACTN2, green) counterstained with DAPI (nuclei, blue). (A) Scale bars, 100  $\mu$ m, (B,F) Scale bars, 50  $\mu$ m, (C, D, E) Scale bars, 10  $\mu$ m. HS = Horse serum; SF = serum free.

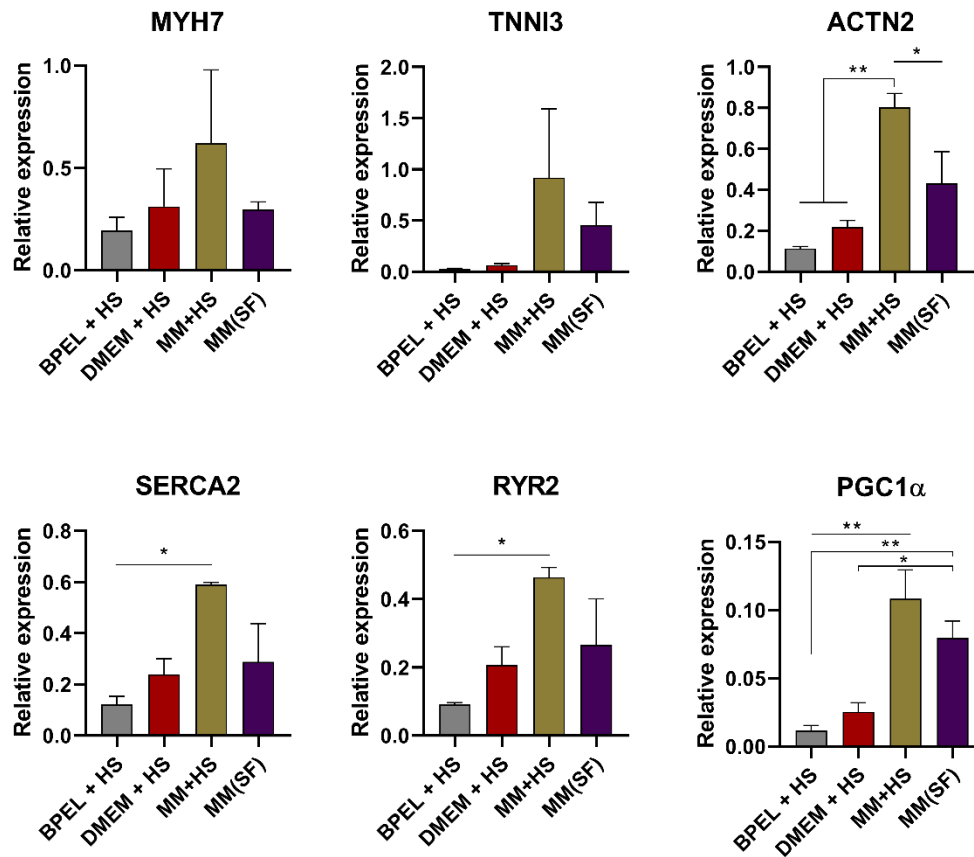

**Figure S9.** Relative gene expression of cardiac genes for hESC-CM BPEL+HS, DMEM+HS, MM+HS or MM(SF) at day 21. Expression levels were normalized to RPLP0 expression. Values are expressed as means  $\pm$  SEM. \* = p < 0.05; \*\* = p < 0.01. HS = Horse serum; SF = serum free.

**Supplementary Table S1.** Primer sequences for RT-qPCR

| Primer        | Forward                  | Reverse              |
|---------------|--------------------------|----------------------|
| RPLP0         | CACCATTGAAATCCTGAGTGATGT | TGACCAGCCCAAAGGAGAAG |
| MYH7          | CGCACCTTCTTCTCTTGCTC     | GAGGACAAGGTCAACACCCT |
| TNNI3         | CAGTAGGCAGGAAGGCTCAG     | CCTCAAGCAGGTGAAGAAGG |
| ACTN2         | CTGCTGCTTTGGTGTCAGAG     | TTCCTATGGGGTCATCCTTG |
| SERCA2        | ACCCACATTCGAGTTGGAAG     | CCAACGAAGGTCAGATTGGT |
| RYR2          | AAGCCTCCGTCTGAAACA       | CCACCCAGACATTAGCAGGT |
| PGC1 $\alpha$ | AACACTTACAAGCCAAACCA     | GGGTTCAATAGTCTTGTCTC |
